# Supplementary material for: Straightforward preparation of Na2(TiO)SiO4 hollow nanotubes as anodes for ultralong cycle life lithium ion battery
Source: Royal Society of Chemistry journal article supplement (doi:10.1039/d0dt03406a), 2021-01-01
Supplement: d0dt03406a1.pdf [file d0dt03406a1.pdf]

**Straight-forward Preparation of Na<sub>2</sub>(TiO)SiO<sub>4</sub> Hollow Nanotubes as Anodes for  
Ultralong Cycling Lifespan Lithium Ion Battery**

Xiaoyu Zhang<sup>a</sup>, Xinjian Li<sup>a</sup>, Xueqin Sun<sup>a</sup>, Xintao Zhang<sup>a</sup>, Litao Kang<sup>a</sup>, Yanli Zhou<sup>a</sup>,

Hua Yuan<sup>b</sup>, Fuyi Jiang<sup>a\*</sup>, Zhipeng Yu<sup>a\*</sup>, Chuanxin Hou<sup>a</sup>

- a. School of Environmental and Material Engineering, Yantai University, Yantai  
264005, China
- b. State Key Laboratory of Bio-Fibers and Eco-Textiles, School of Materials Science  
and Engineering, Qingdao University, Qingdao 266071, China

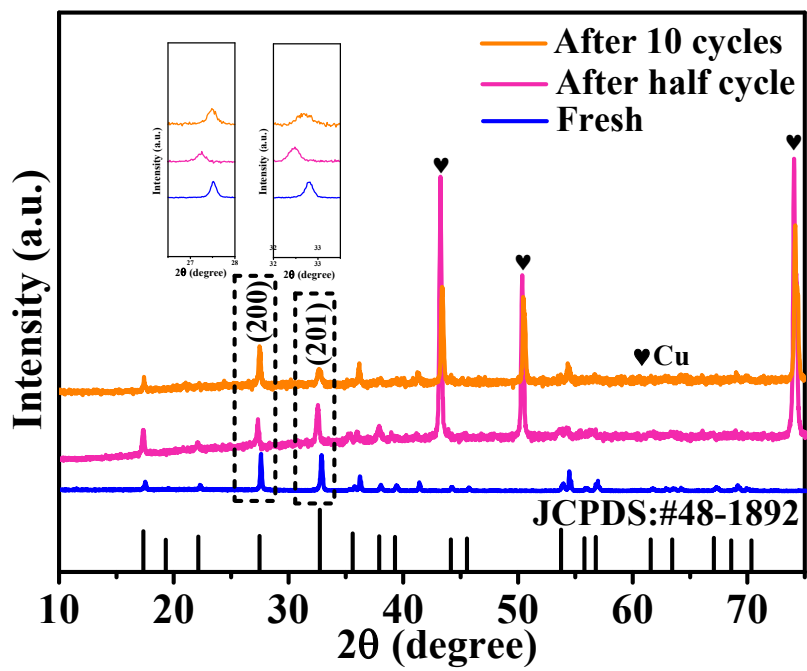

Figure S1 XRD patterns of fresh, after half cycle and 10 cycles of SNT0-1 electrodes.

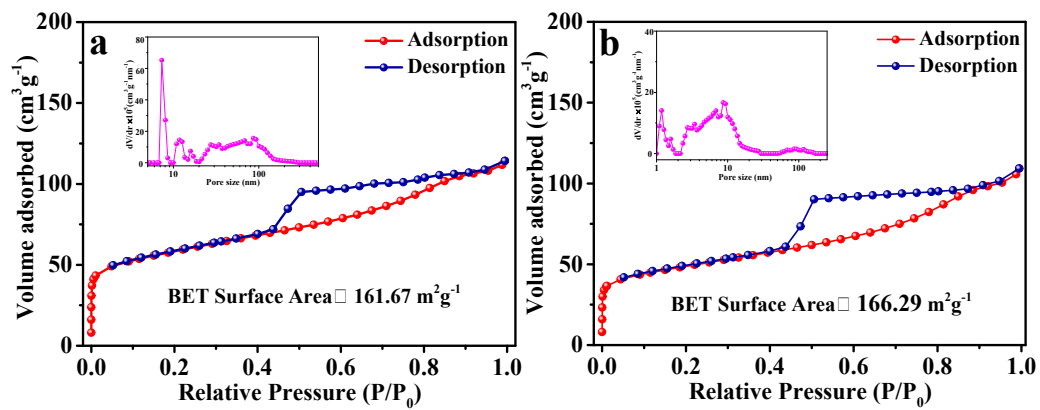

Figure S2 Nitrogen adsorption/desorption isotherm loop and pore size distribution curves obtained through the desorption branch used the BJH model of SNTO-0.8 (a) and SNTO-1.2 (b).

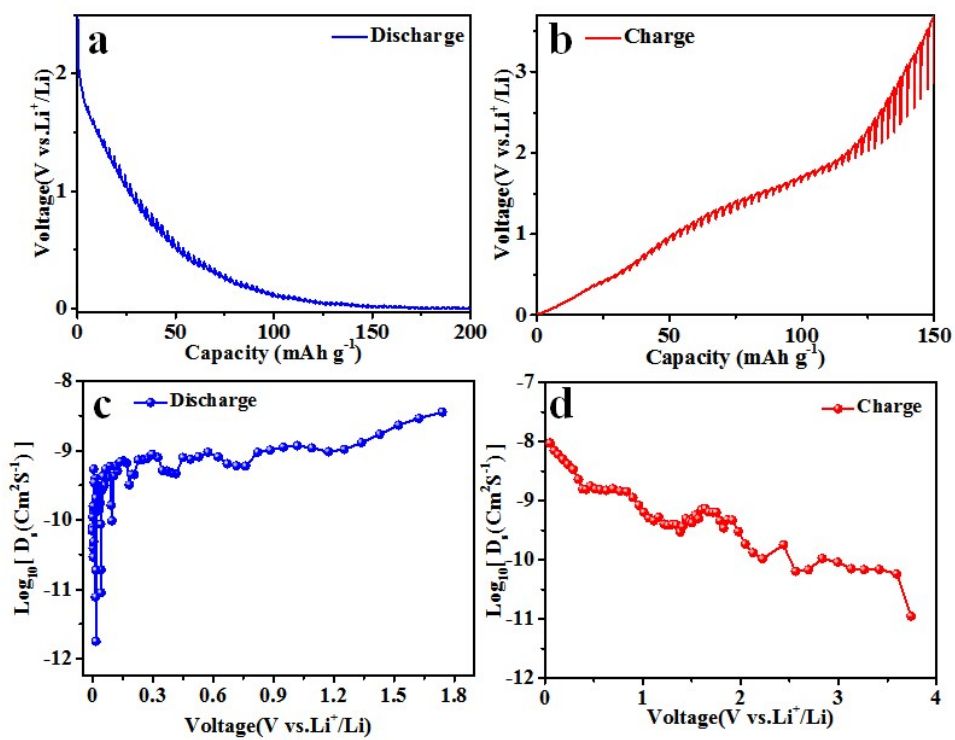

Figure S3 GITT measurement results of SNT0-0.8 electrode: a) GITT discharge curve, b) GITT charging curve, c) Li<sup>+</sup> diffusion coefficient ( $D_{Li}$ ) during discharge, d) Li<sup>+</sup> diffusion coefficient ( $D_{Li}$ ) during charging.

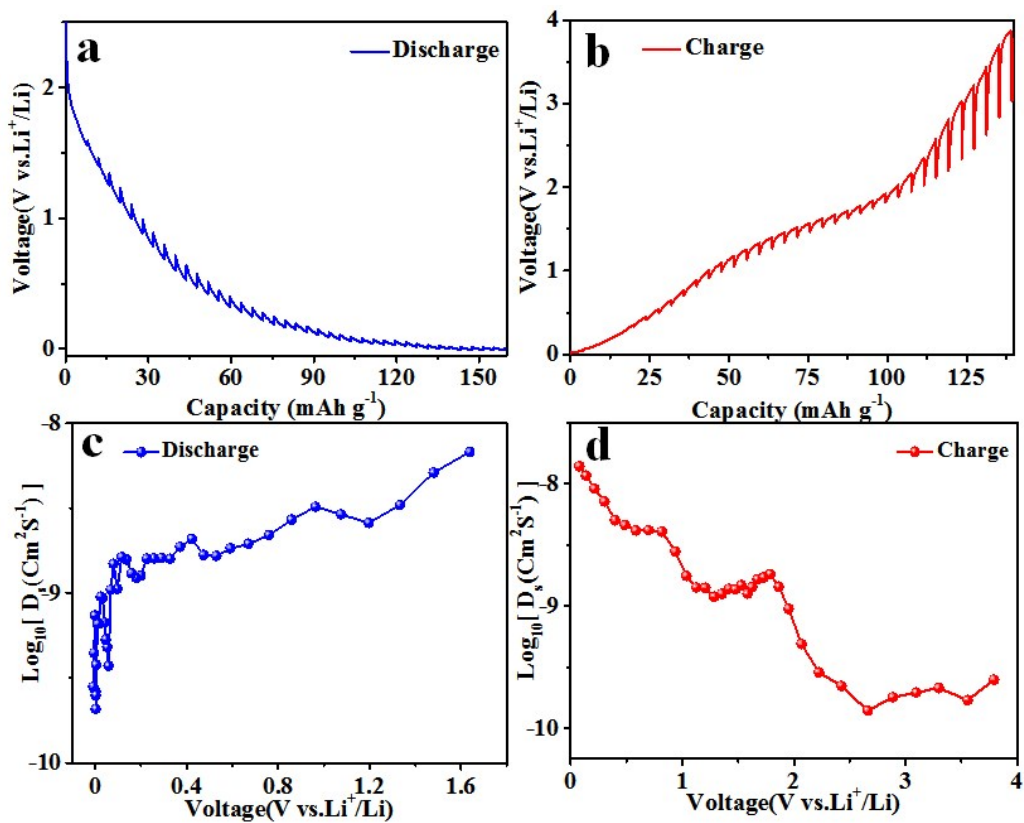

Figure S4 GITT measurement results of SNT0-0.8 electrode: a) GITT discharge curve, b) GITT charging curve, c) Li<sup>+</sup> diffusion coefficient (D<sub>Li</sub>) during discharge, d) Li<sup>+</sup> diffusion coefficient (D<sub>Li</sub>) during charging.

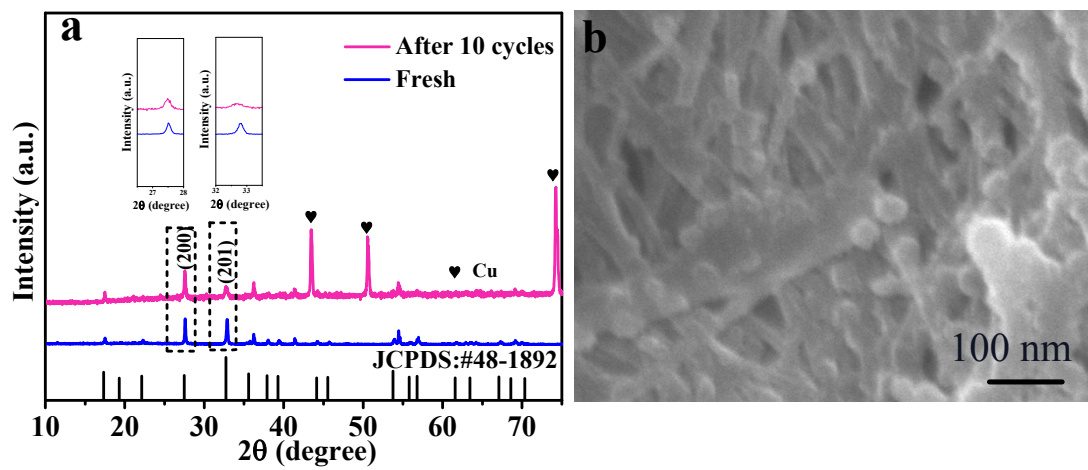

Figure S5 XRD patterns (a) and SEM of SNT0-1 nanotube electrodes after 10 cycles.
